# Supplementary material for: Cost-effectiveness of Nivolumab-Ipilimumab Combination Therapy for the Treatment of Advanced Non–Small Cell Lung Cancer
Source: PubMed Central journal article supplement (PMC8094011; doi:10.1001/jamanetworkopen.2021.8787), 2021-05-03
Supplement: jamanetwopen-e218787-s001.pdf [file jamanetwopen-e218787-s001.pdf]

## Supplementary Online Content

Courtney PT, Yip AT, Cherry DR, Salans MA, Kumar A, Murphy JD. Cost-effectiveness of nivolumab-ipilimumab combination therapy for the treatment of advanced non–small cell lung cancer. *JAMA Netw Open*. 2021;4(5):e218787. doi:10.1001/jamanetworkopen.2021.8787

**eMethods.** Methods for Determining Drug Costs

**eFigure.** Tornado Diagram of 1-Way Sensitivity Analyses

**eTable 1.** Model Validation

**eTable 2.** Associated Costs of Grade 3 to 4 Treatment-Related Adverse Events

**eTable 3.** Disutility From Grade 3 to 4 Treatment-Related Adverse Events

**eTable 4.** Results of 1-Way Sensitivity Analysis

**eReferences**

This supplementary material has been provided by the authors to give readers additional information about their work.

## **eMethods.** Methods for Determining Drug Costs

Per the CheckMate 227 trial, patients in the nivolumab-ipilimumab arm received nivolumab at a dose of 3 mg/kg body weight every two weeks and ipilimumab at a dose of 1 mg/kg body weight every 6 weeks. In the chemotherapy arm, patients received platinum-doublet chemotherapy every three weeks for up to four cycles. The specific chemotherapeutic agents and dosing used in CheckMate 227 varied by tumor histology (squamous versus nonsquamous); therefore, with our costs of chemotherapy, we calculated a weighted average between the two tumor histologic types reported in the trial. With drug cost calculations, we used a body weight of 73kg, based on the male-female proportions in CheckMate 227 using sex-specific body weights<sup>1</sup>, and a body surface area of 1.78m<sup>2</sup>, based on cancer patient-specific averages<sup>2</sup>. In the sensitivity analysis including maintenance pemetrexed for chemotherapy patients, the cost of maintenance pemetrexed was based on the CheckMate 227 trial's specified dose (500mg/m<sup>2</sup>), the proportion of patients with nonsquamous histology, and was assumed to be given every three weeks. Second-line treatment costs<sup>36,37</sup> were calculated as frequency-weighted averages using reported subsequent treatments received by at least 3% of patients for each treatment arm in CheckMate 227. We did not include "targeted therapy" in second-line treatment costs in either arm because those agents were not specified. Drug costs were adjusted to a monthly rate to match the cycle length of our model. Costs of toxicities<sup>38-41</sup>, stable disease<sup>41</sup>, progression<sup>41</sup>, and death<sup>41</sup> were obtained from the literature.

**eFigure.** Tornado Diagram of 1-Way Sensitivity Analyses

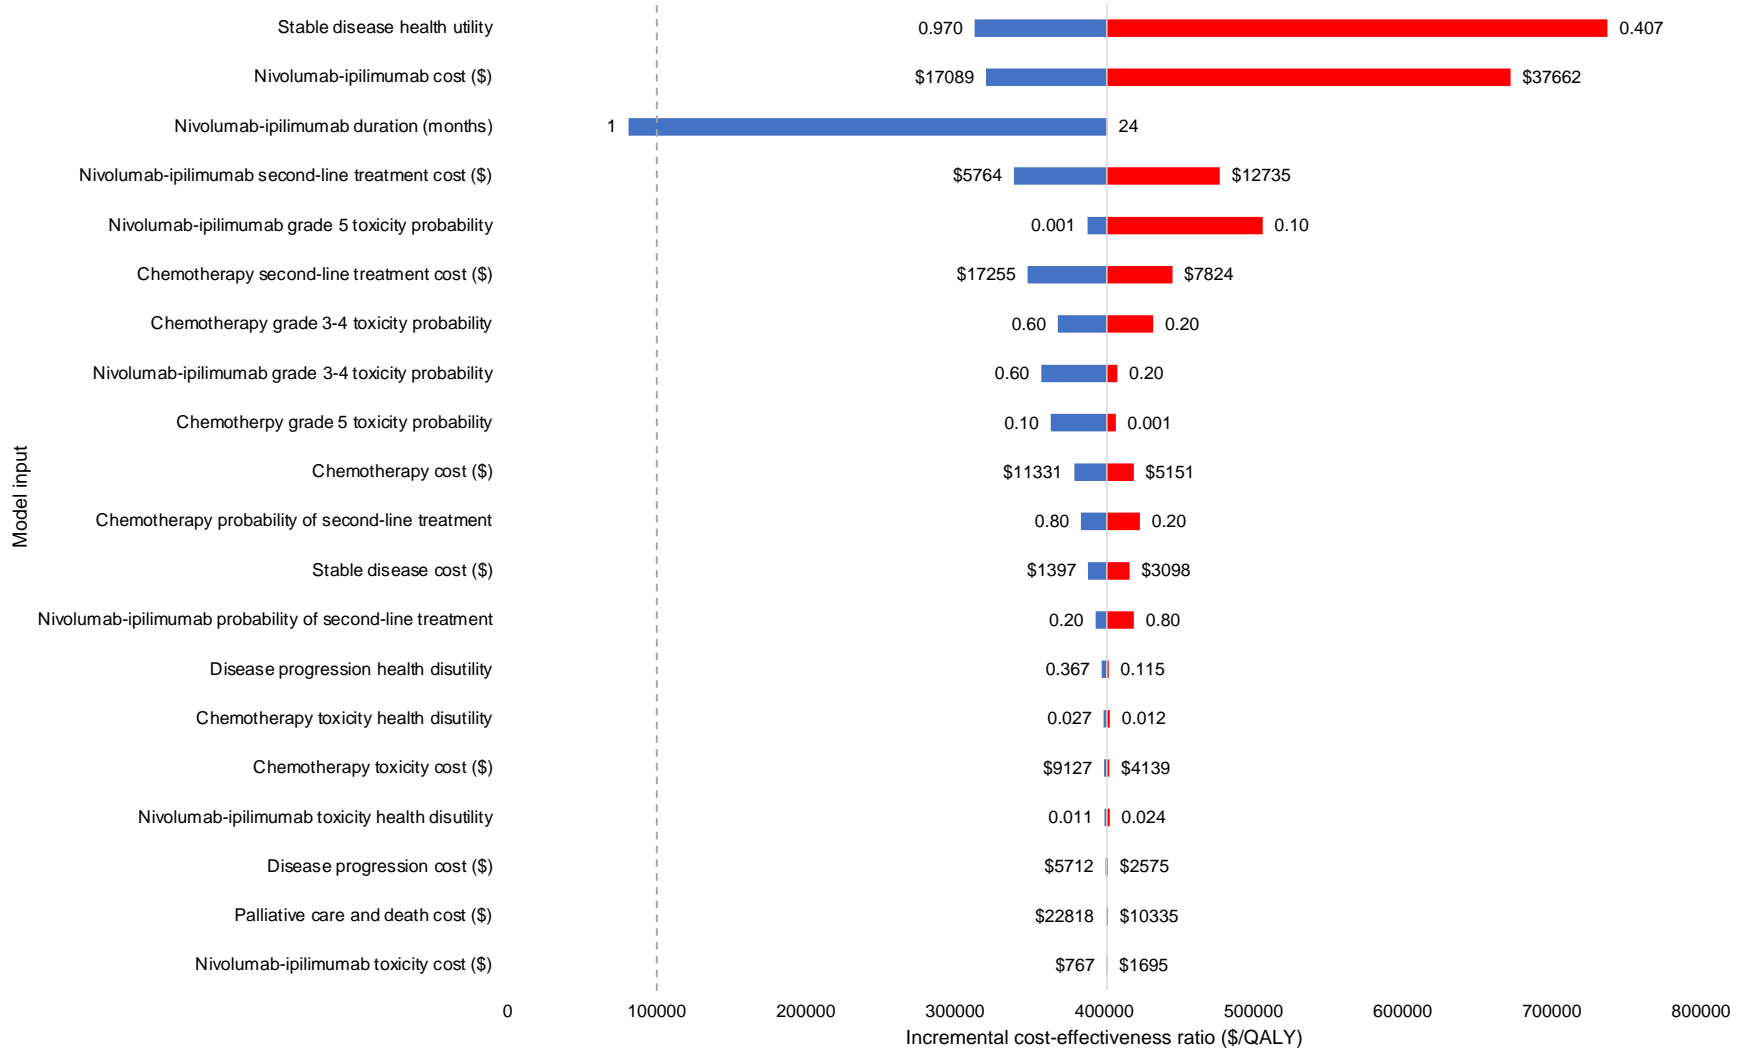

This graph represents the incremental cost-effectiveness ratio (ICER) of nivolumab-ipilimumab compared to chemotherapy in all patients when individually varying the parameters of the base case cost-effectiveness model. The solid vertical line represents the base case analysis ICER (\$401,700/QALY) for nivolumab-ipilimumab compared to chemotherapy, and the vertical dashed line represents the willingness-to-pay threshold of \$100,000/QALY.

**eTable 1. Model Validation**

| Study End Point                    | Cost-Effectiveness | CheckMate 227 |
|------------------------------------|--------------------|---------------|
|                                    | Model, %           | Trial, %      |
| Overall Survival (2 year)          |                    |               |
| Nivolumab + ipilimumab             | 40.2               | 40            |
| Chemotherapy                       | 30.2               | 30            |
| Progression-Free Survival (2 year) |                    |               |
| Nivolumab + ipilimumab             | 20.1               | 20            |
| Chemotherapy                       | 6.4                | 6             |
| Grade 3-4 Toxicity                 |                    |               |
| Nivolumab + ipilimumab             | 32.8               | 32.8          |
| Chemotherapy                       | 36.0               | 36.0          |
| Grade 5 Toxicity                   |                    |               |
| Nivolumab + ipilimumab             | 1.4                | 1.4           |
| Chemotherapy                       | 1.1                | 1.1           |

This table quantitatively compares 2-year overall and progression-free survival rates and grade 3-4 and grade 5 treatment-related toxicities reported in the CheckMate 227 trial with those produced by our model.

**eTable 2.** Associated Costs of Grade 3 to 4 Treatment-Related Adverse Events

| Adverse Event <sup>a</sup>           | No. of patients (%) <sup>b</sup> | Costs in 2020 USD <sup>c</sup> | Reference                             |
|--------------------------------------|----------------------------------|--------------------------------|---------------------------------------|
| <b>Nivolumab-ipilimumab</b>          |                                  |                                |                                       |
| Fatigue, asthenia                    | 18 (3.1)                         | 1,065.44                       | Niraula et al <sup>38</sup> , 2014    |
| Rash, pruritus                       | 12 (2.1)                         | 272.33                         | Hornberger et al <sup>39</sup> , 2015 |
| Diarrhea                             | 10 (1.7)                         | 169.93                         | Hornberger et al <sup>39</sup> , 2015 |
| Decreased appetite, nausea, vomiting | 9 (1.6)                          | 160.13                         | Hornberger et al <sup>39</sup> , 2015 |
| Anemia                               | 8 (1.4)                          | 5,243.47                       | Smith et al <sup>40</sup> , 2002      |
| <i>Weighted average<sup>d</sup></i>  | -                                | <i>1,184.81</i>                |                                       |
| <b>Chemotherapy</b>                  |                                  |                                |                                       |
| Anemia                               | 66 (11.6)                        | 5,243.47                       | Smith et al <sup>40</sup> , 2002      |
| Neutropenia                          | 54 (9.5)                         | 16,857.15                      | Hornberger et al <sup>39</sup> , 2015 |
| Neutrophil count decreased           | 36 (6.3)                         | 907.00                         | Insinga <sup>41</sup> , 2019          |
| Decreased appetite, nausea, vomiting | 32 (5.6)                         | 160.13                         | Hornberger et al <sup>39</sup> , 2015 |
| Fatigue, asthenia                    | 13 (2.2)                         | 1,065.44                       | Niraula et al <sup>38</sup> , 2014    |
| Diarrhea                             | 4 (0.7)                          | 169.93                         | Hornberger et al <sup>39</sup> , 2015 |
| <i>Weighted average<sup>d</sup></i>  | -                                | <i>6,383.72</i>                |                                       |

<sup>a</sup>Refers to treatment-related adverse events of any grade that occurred in  $\geq 15\%$  of total patients in the CheckMate 227 trial. Our analysis only included and evaluated grade 3-4 treatment-related adverse events.

<sup>b</sup>Number within treatment arm: nivolumab-ipilimumab (N=576), chemotherapy (N=570).

<sup>c</sup>Cost per one-month cycle.

<sup>d</sup>Calculated as an average cost of toxicity using the weighted frequency of occurrence. This value was used in the base-case model.

**eTable 3.** Disutility From Grade 3 to 4 Treatment-Related Adverse Events

| Adverse Event <sup>a</sup>           | Number of patients (%) <sup>b</sup> | Disutility <sup>c</sup> | Reference                             |
|--------------------------------------|-------------------------------------|-------------------------|---------------------------------------|
| <b>Nivolumab-ipilimumab</b>          |                                     |                         |                                       |
| Fatigue, asthenia                    | 18 (3.1)                            | 0.024                   | Nafees et al <sup>43</sup> , 2017     |
| Rash, pruritus                       | 12 (2.1)                            | 0.013                   | Nafees et al <sup>43</sup> , 2017     |
| Diarrhea                             | 10 (1.7)                            | 0.018                   | Nafees et al <sup>43</sup> , 2017     |
| Decreased appetite, nausea, vomiting | 9 (1.6)                             | 0.017                   | Nafees et al <sup>43</sup> , 2017     |
| Anemia                               | 8 (1.4)                             | 0.006                   | Freeman et al <sup>42</sup> , 2015    |
| <i>Weighted average<sup>d</sup></i>  | -                                   | <i>0.017</i>            |                                       |
| <b>Chemotherapy</b>                  |                                     |                         |                                       |
| Anemia                               | 66 (11.6)                           | 0.006                   | Freeman et al <sup>42</sup> , 2015    |
| Neutropenia                          | 54 (9.5)                            | 0.029                   | Nafees et al <sup>43</sup> , 2017     |
| Neutrophil count decreased           | 36 (6.3)                            | 0.029                   | Hornberger et al <sup>39</sup> , 2015 |
| Decreased appetite, nausea, vomiting | 32 (5.6)                            | 0.017                   | Nafees et al <sup>43</sup> , 2017     |
| Fatigue, asthenia                    | 13 (2.2)                            | 0.024                   | Nafees et al <sup>43</sup> , 2017     |
| Diarrhea                             | 4 (0.7)                             | 0.018                   | Nafees et al <sup>43</sup> , 2017     |
| <i>Weighted average<sup>d</sup></i>  | -                                   | <i>0.019</i>            |                                       |

<sup>a</sup>Refers to treatment-related adverse events of any grade that occurred in  $\geq 15\%$  of total patients in the CheckMate 227 trial. Our analysis only included and evaluated grade 3-4 treatment-related adverse events.

<sup>b</sup>Number within treatment arm: nivolumab-ipilimumab (N=576), chemotherapy (N=570).

<sup>c</sup>Disutility per one-month cycle.

<sup>d</sup>Calculated as an average disutility of toxicity using the weighted frequency of occurrence. This value was used in the base-case model.

**eTable 4.** Results of 1-Way Sensitivity Analysis

| <b>Model</b>                                                                                | <b>ICER (\$/QALY)</b> |
|---------------------------------------------------------------------------------------------|-----------------------|
| Base Case                                                                                   | 401,700               |
| <b>Perspective</b>                                                                          |                       |
| Health Care Payer                                                                           | 401,700               |
| Societal                                                                                    | 434,400               |
| <b>Duration of nivolumab-ipilimumab treatment</b>                                           |                       |
| 24 months maximum                                                                           | 401,700               |
| 12 months maximum                                                                           | 361,700               |
| 4 months maximum <sup>a</sup>                                                               | 235,200               |
| Continue after disease progression <sup>b</sup>                                             | 551,900               |
| Continue after grade 3-4 treatment-related adverse event                                    | 467,300               |
| <b>Including maintenance pemetrexed in chemotherapy arm</b>                                 | 363,400               |
| <b>Survival Assumptions</b>                                                                 |                       |
| <i>Reduced risk of death from nivolumab-ipilimumab</i>                                      |                       |
| 27% reduction in risk of death (HR 0.73) <sup>c</sup>                                       | 401,700               |
| 36% reduction in risk of death (HR 0.64) <sup>d</sup>                                       | 249,300               |
| <i>Survival beyond trial range<sup>e</sup></i>                                              |                       |
| All patients alive at 42 months follow SEER survival data for advanced NSCLC                | 401,700               |
| All patients alive at 42 months follow cured <sup>f</sup> of disease                        | 317,300               |
| Nivolumab-ipilimumab patients alive at 42 months cured <sup>f</sup> of disease <sup>g</sup> | 287,800               |
| <b>PD-L1 Expression Level</b>                                                               |                       |
| All patients                                                                                | 401,700               |
| ≥1%                                                                                         | 440,100               |
| ≥50%                                                                                        | 375,700               |
| <1%                                                                                         | 332,100               |

Abbreviations: QALY, quality-adjusted life-year; HR, hazard ratio; SEER, Surveillance, Epidemiology, and End Results; NSCLC, non-small cell lung cancer; PD-L1, programmed death-ligand 1.

<sup>a</sup>Median duration of nivolumab-ipilimumab therapy was 4.2 months in CheckMate 227 trial.

<sup>b</sup>Patients remain on nivolumab-ipilimumab for two years per CheckMate 227 protocol.

<sup>c</sup>HR of death in nivolumab-ipilimumab arm compared to chemotherapy in all patients in CheckMate 227 trial. This value was used in base-case model.

<sup>d</sup>Lower end of 95% confidence interval for HR of death in nivolumab-ipilimumab arm compared to chemotherapy in all patients in CheckMate 227 trial.

<sup>e</sup>CheckMate 227 reported survival data through 42 months.

<sup>f</sup>Survival beyond trial range followed US Social Security Administration Actuarial Life Tables<sup>24</sup>.

<sup>g</sup>Those on chemotherapy assumed to not be cured of disease, and survival beyond trial range followed SEER data.

## eReferences

1. Baracos VE, Reiman T, Mourtzakis M, Gioulbasanis I, Antoun S. Body composition in patients with non-small cell lung cancer: a contemporary view of cancer cachexia with the use of computed tomography image analysis. *Am J Clin Nutr.* 2010;91(4):1133S-1137S.
2. Sacco JJ, Botten J, Macbeth F, Bagust A, Clark P. The average body surface area of adult cancer patients in the UK: a multicentre retrospective study. *PLoS One.* 2010;5(1):e8933.
